# Supplementary material for: Rational synthesis of an ultra-stable Zn(ii) coordination polymer based on a new tripodal pyrazole ligand for the highly sensitive and selective detection of Fe3+ and Cr2O72− in aqueous media
Source: Royal Society of Chemistry journal article supplement (doi:10.1039/d0dt01996h), 2020-01-01
Supplement: d0dt01996h1.pdf [file d0dt01996h1.pdf]

**Supporting information for**

**Rational synthesis of an ultra-stable Zn(II) coordination polymer based on a new tripodal pyrazole ligand for highly sensitive and selective detection of Fe<sup>3+</sup> and Cr<sub>2</sub>O<sub>7</sub><sup>2-</sup> in aqueous media**

Shi-Hui Zhang,<sup>‡</sup> Shu-Yu Zhang,<sup>‡</sup> Jing-Rong Li, Zhen-Qi Huang, Jing Yang, Ke-Fen Yue\* and Yao-Yu Wang

*Key Laboratory of Synthetic and Natural Functional Molecule of the Ministry of Education, National Demonstration Center for Experimental Chemistry Education (Northwest University), Shaanxi Key Laboratory of Physico-Inorganic Chemistry, College of Chemistry and Materials Science, Northwest University, Xi'an 710127, China*

**Table S1** List of several reported Zn(II) coordination polymers for luminescent sensing

| Ligands type                                                | Chemical Stability   | Applications                                                                                                                                        | Ref. |
|-------------------------------------------------------------|----------------------|-----------------------------------------------------------------------------------------------------------------------------------------------------|------|
| A carboxylate ligand                                        | Poor water stability | Sensing $\text{Cr}_2\text{O}_7^{2-}$ , $\text{CrO}_4^{2-}$ and $\text{Fe}^{3+}$ in DMF/ $\text{H}_2\text{O}$ or DMA/ $\text{H}_2\text{O}$ solutions | 1    |
| A carboxylate ligand                                        | Poor water stability | Sensing 2,4,6-trinitrophenol in DMF solution                                                                                                        | 2    |
| A carboxylate ligand                                        | Poor water stability | Sensing tetrabromobisphenol A in EtOH solution                                                                                                      | 3    |
| A carboxylate ligand                                        | Poor water stability | Sensing $\text{Fe}^{3+}$ , $\text{Cu}^{2+}$ and nitrobenzene in DMF solution                                                                        | 4    |
| A carboxylate ligand                                        | Poor water stability | Sensing 2,4,6-trinitrophenol in DMF media                                                                                                           | 5    |
| A carboxylate ligand                                        | Poor water stability | Sensing $\text{Fe}^{3+}$ and trinitrotoluene in DMF solution                                                                                        | 6    |
| A carboxylate ligand                                        | Poor water stability | Sensing nitroaromatics and $\text{Fe}^{3+}$ in DMF solution                                                                                         | 7    |
| A carboxylate ligand & a flexible pyridine-based ligands    | Poor water stability | Sensing $\text{Cr}^{3+}$ , $\text{CrO}_4^{2-}$ , $\text{Cr}_2\text{O}_7^{2-}$ , 4-nonylphenol, and 2,4,6-trinitrophenol in DMF solution             | 8    |
| A carboxylate ligand & a rigid pyridine-based ligand        | Good water stability | Sensing $\text{MnO}_4^-$ , $\text{Cr}_2\text{O}_7^{2-}$ and $\text{CrO}_4^{2-}$ in aqueous media                                                    | 9    |
| A carboxylate ligand & a rigid pyridine-based ligand        | Good water stability | Sensing $\text{Cr}^{3+}$ , $\text{Cr}_2\text{O}_7^{2-}$ , and <i>p</i> -nitrotoluene in aqueous media                                               | 10   |
| A carboxylate ligand & the rigid phen                       | Good water stability | Sensing $\text{CrO}_4^{2-}$ and $\text{Cr}_2\text{O}_7^{2-}$ in aqueous media                                                                       | 11   |
| A carboxylate ligand & the rigid phen                       | Good water stability | Sensing uric acid in aqueous media                                                                                                                  | 12   |
| A sulfonate ligand & a flexible azole-based ligands         | Good water stability | Sensing $\text{Fe}^{3+}$ in aqueous media                                                                                                           | 13   |
| A carboxylate ligand & a flexible azole-based ligand        | Good water stability | Sensing glyoxal and $\text{Cr}_2\text{O}_7^{2-}$ in aqueous media                                                                                   | 14   |
| A carboxylate ligand & a rigid pyridine-based ligand        | Good water stability | Sensing $\text{MnO}_4^-$ and $\text{Cr}_2\text{O}_7^{2-}$ in aqueous media                                                                          | 15   |
| A carboxylate ligand & a rigid azole/pyridine-based ligands | Good water stability | Sensing 2,6-dichloro-4-nitroaniline, $\text{Fe}^{3+}$ , $\text{CrO}_4^{2-}$ , and $\text{Cr}_2\text{O}_7^{2-}$ in aqueous media                     | 16   |

|                                                                          |                                              |                                                                                                                                                       |                  |
|--------------------------------------------------------------------------|----------------------------------------------|-------------------------------------------------------------------------------------------------------------------------------------------------------|------------------|
| A carboxylate ligand & an azole ligand                                   | Good solvent stability                       | Sensing aniline and benzaldehyde in DMF and $\text{Cr}_2\text{O}_7^{2-}$ and $\text{CrO}_4^{2-}$ in aqueous media                                     | 17               |
| A carboxylate ligand & a rigid pyridine-based ligand                     | Good solvent stability                       | Sensing 2,4,6-trinitrophenol in DMF and $\text{Fe}^{3+}$ and $\text{Al}^{3+}$ in aqueous media                                                        | 18               |
| A carboxylate ligand & a rigid tritopic pyridine-based ligand            | Good water and pH stability                  | Sensing acetylacetone in aqueous media                                                                                                                | 19               |
| A carboxylate ligand & a rigid pyridine-based ligand                     | Good water and pH stability                  | Sensing $\text{Cr}_2\text{O}_7^{2-}$ and $\text{CrO}_4^{2-}$ in aqueous media                                                                         | 20               |
| A carboxylate ligand & a semi-rigid azole/pyridine-based ligands         | Good water and pH stability                  | pH sensing in aqueous media                                                                                                                           | 21               |
| A carboxylate ligand & an azole ligand                                   | Good water and pH stability                  | Sensing $\text{Fe}^{3+}$ , $\text{Al}^{3+}$ , $\text{SiF}_6^{2-}$ , $\text{Cr}_2\text{O}_7^{2-}$ , nitrofurantoin, and nitrofurazone in aqueous media | 22               |
| A carboxylate ligand & a rigid pyridine-based ligand                     | Good water and pH stability                  | Sensing $\text{Cr}_2\text{O}_7^{2-}$ , $\text{CrO}_4^{2-}$ and 2,4,6-trinitrophenol in aqueous media                                                  | 23               |
| Flexible azole-based ligands                                             | Good water and pH stability                  | Sensing $\text{Cr}_2\text{O}_7^{2-}/\text{CrO}_4^{2-}$ in aqueous media                                                                               | 24               |
| <b>A carboxylate ligand &amp; a rigid tritopic pyrazole-based ligand</b> | <b>Good water, thermal, and pH stability</b> | <b>Sensing <math>\text{Fe}^{3+}</math> and <math>\text{Cr}_2\text{O}_7^{2-}</math> in aqueous media</b>                                               | <b>This work</b> |

**Table S2** Crystal data and structure refinements for complex **1**

| Complex           | <b>1</b>                                           |
|-------------------|----------------------------------------------------|
| Molecular Formula | $\text{C}_{24}\text{H}_{16}\text{ZnN}_6\text{O}_6$ |
| Formula Weight    | 547.78                                             |
| Temperature (K)   | 296(2)                                             |
| Crystal System    | monoclinic                                         |
| Space Group       | $P2_1/c$                                           |
| $a$ (Å)           | 16.0291(19)                                        |
| $b$ (Å)           | 8.3132(10)                                         |
| $c$ (Å)           | 17.158(2)                                          |
| $\alpha$ (°)      | 90                                                 |
| $\beta$ (°)       | 91.520(2)                                          |

|                              |           |
|------------------------------|-----------|
| $\gamma$ (°)                 | 90        |
| $V$ (Å <sup>3</sup> )        | 2285.5(5) |
| $Z$                          | 4         |
| Dc (g·cm <sup>-3</sup> )     | 1.598     |
| $F(000)$                     | 1112.0    |
| [ $R(\text{int})$ ]          | 0.0282    |
| GOF on $F^2$                 | 1.041     |
| $R_1^a$ [ $I > 2\sigma(I)$ ] | 0.0348    |
| $wR_2^b$ [all data]          | 0.0911    |

$$^a R_1 = \frac{\sum ||F_o| - |F_c||}{\sum |F_o|}, \quad ^b wR_2 = \left[ \frac{\sum w(F_o^2 - F_c^2)^2}{\sum w(F_o^2)^2} \right]^{1/2}$$

**Table S3** Selected bond distances (Å) and angles (°) for complex **1**

| <b>1</b>        |            |                 |            |
|-----------------|------------|-----------------|------------|
| Zn(1)-O(1)      | 1.9577(17) | Zn(1)-N(1)      | 2.012(2)   |
| Zn(1)-O(5)      | 2.0084(17) | Zn(1)-O(6)      | 2.3702(19) |
| Zn(1)-N(3)      | 1.994(2)   | O(1)-Zn(1)-O(6) | 154.46(7)  |
| O(5)-Zn(1)-O(6) | 58.85(7)   | O(5)-Zn(1)-N(1) | 116.85(9)  |
| N(1)-Zn(1)-O(6) | 96.06(8)   | N(3)-Zn(1)-O(5) | 128.76(9)  |
| N(3)-Zn(1)-N(1) | 107.02(9)  | N(3)-Zn(1)-O(6) | 92.68(8)   |
| O(1)-Zn(1)-O(5) | 97.43(7)   | O(1)-Zn(1)-N(1) | 103.98(8)  |
| O(1)-Zn(1)-N(3) | 96.36(8)   |                 |            |

**Table S4** Kinetic parameters of the complex **1**

| Complex  | $\beta$<br>(K·min <sup>-1</sup> ) | $T_p$ (K) | Kissinger's method                 |                                   | Ozawa–Doyle's method |                                      |              |
|----------|-----------------------------------|-----------|------------------------------------|-----------------------------------|----------------------|--------------------------------------|--------------|
|          |                                   |           | $E_K^{\S}$ (kJ·mol <sup>-1</sup> ) | $\ln A_K^{\S}$ (s <sup>-1</sup> ) | $R_K$                | $E_O^{\S\S}$ (kJ·mol <sup>-1</sup> ) | $R_O^{\S\S}$ |
| <b>1</b> | 2                                 | 696.56    |                                    |                                   |                      |                                      |              |
|          | 5                                 | 712.17    |                                    |                                   |                      |                                      |              |
|          | 8                                 | 721.17    | 214.80                             | 13.37                             | 0.9996               | 215.50                               | 0.9994       |
|          | 10                                | 768.83    |                                    |                                   |                      |                                      |              |

§ subscript K represents Kissinger's method

§§ subscript O represents Ozawa–Doyle's method

**Table S5** Thermodynamic parameters of the complex **1**

| Complex  | $\beta$<br>K·min <sup>-1</sup> | $\Delta G^\ddagger$<br>kJ·mol <sup>-1</sup> | $\Delta H^\ddagger$<br>kJ·mol <sup>-1</sup> | $\Delta S^\ddagger$<br>J·mol <sup>-1</sup> ·K <sup>-1</sup> | $T_p$<br>K |
|----------|--------------------------------|---------------------------------------------|---------------------------------------------|-------------------------------------------------------------|------------|
| <b>1</b> | 2                              | 313.25                                      | 209.01                                      | -149.66                                                     | 696.56     |
|          | 5                              | 315.58                                      | 208.88                                      | -149.83                                                     | 712.17     |
|          | 8                              | 316.93                                      | 208.80                                      | -149.93                                                     | 721.17     |
|          | 10                             | 324.06                                      | 208.41                                      | -150.43                                                     | 768.83     |
| Mean     |                                | 317.46                                      | 208.77                                      | -149.96                                                     | 724.68     |

**Table S6** Comparison of the Stern-Volmer constant ( $K_{SV}$ ) used for sensing Fe<sup>3+</sup> with other coordination polymers

| Materials                                                                                                                                   | Medium             | $K_{sv}$ (M <sup>-1</sup> ) | Ref.             |
|---------------------------------------------------------------------------------------------------------------------------------------------|--------------------|-----------------------------|------------------|
| <b>Eu<sub>2</sub>(MFDA)<sub>2</sub>(HCOO)<sub>2</sub>(H<sub>2</sub>O)<sub>6</sub></b>                                                       | DMF                | 1.58 × 10 <sup>3</sup>      | 25               |
| <b>[Eu<sub>2</sub>(L<sub>2</sub>)<sub>1.5</sub>(H<sub>2</sub>O)<sub>2</sub>EtOH]·DMF</b>                                                    | DMF                | 2.94 × 10 <sup>3</sup>      | 26               |
| <b>Tb-DSOA</b>                                                                                                                              | H <sub>2</sub> O   | 3.54 × 10 <sup>3</sup>      | 27               |
| <b>Ln(cpty)<sub>3</sub></b>                                                                                                                 | H <sub>2</sub> O   | 4.10 × 10 <sup>3</sup>      | 28               |
| <b>[Zr<sub>6</sub>O<sub>4</sub>(OH)<sub>4</sub>(C<sub>8</sub>H<sub>2</sub>O<sub>4</sub>S<sub>2</sub>)<sub>6</sub>]·DMF·18H<sub>2</sub>O</b> | H <sub>2</sub> O   | 4.40 × 10 <sup>3</sup>      | 29               |
| <b>Eu<sup>3+</sup>@MIL-53-COOH·(Al)</b>                                                                                                     | H <sub>2</sub> O   | 5.12 × 10 <sup>3</sup>      | 30               |
| <b>Bis(rhodamine)-1</b>                                                                                                                     | CH <sub>3</sub> CN | 7.50 × 10 <sup>3</sup>      | 31               |
| <b>Eu-BPDA</b>                                                                                                                              | H <sub>2</sub> O   | 1.25 × 10 <sup>4</sup>      | 32               |
| <b>[La(TPT)(DMSO)<sub>2</sub>]·H<sub>2</sub>O</b>                                                                                           | EtOH               | 1.36 × 10 <sup>4</sup>      | 33               |
| <b>[Zn(tpb)(Hbtc)]<sub>n</sub></b>                                                                                                          | H <sub>2</sub> O   | 1.57 × 10 <sup>4</sup>      | <b>This work</b> |
| <b>BUT-15</b>                                                                                                                               | H <sub>2</sub> O   | 1.66 × 10 <sup>4</sup>      | 34               |
| <b>Benzimidazole-based sensor</b>                                                                                                           | H <sub>2</sub> O   | 8.51 × 10 <sup>4</sup>      | 35               |

**Table S7** Comparison of the Stern-Volmer constant ( $K_{sv}$ ) used for sensing  $\text{Cr}_2\text{O}_7^{2-}$  with other coordination polymers.

| Materials                                                                                             | Luminescent substrates       | Medium               | $K_{sv}$ ( $\text{M}^{-1}$ ) | Ref.             |
|-------------------------------------------------------------------------------------------------------|------------------------------|----------------------|------------------------------|------------------|
| $\{\text{Cd}(\text{L})(\text{SDBA})(\text{H}_2\text{O})\} \cdot 0.5\text{H}_2\text{O}\}_n$            | $\text{Cr}_2\text{O}_7^{2-}$ | $\text{H}_2\text{O}$ | $4.97 \times 10^3$           | 36               |
| $\{\text{Cd}(\text{L})(\text{BPDC})\} \cdot 2\text{H}_2\text{O}\}_n$                                  | $\text{Cr}_2\text{O}_7^{2-}$ | $\text{H}_2\text{O}$ | $6.40 \times 10^3$           | 36               |
| $\text{Zn}_2(\text{ttz})\text{H}_2\text{O}$                                                           | $\text{Cr}_2\text{O}_7^{2-}$ | $\text{H}_2\text{O}$ | $2.19 \times 10^3$           | 24               |
| $\text{Zn}(\text{btz})$                                                                               | $\text{Cr}_2\text{O}_7^{2-}$ | $\text{H}_2\text{O}$ | $4.23 \times 10^3$           | 24               |
| $\text{Eu}^{3+}@\text{MIL-121}$                                                                       | $\text{Cr}_2\text{O}_7^{2-}$ | $\text{H}_2\text{O}$ | $4.34 \times 10^3$           | 37               |
| $\{\text{Zn}_3(\text{tza})_2(\mu_2\text{-OH})_2(\text{H}_2\text{O})_2\} \cdot \text{H}_2\text{O}\}_n$ | $\text{Cr}_2\text{O}_7^{2-}$ | $\text{H}_2\text{O}$ | $5.02 \times 10^3$           | 38               |
| $[\text{Zn}_2(\text{TPOM})(\text{BDC})_2] \cdot 4\text{H}_2\text{O}$                                  | $\text{Cr}_2\text{O}_7^{2-}$ | DMF                  | $7.59 \times 10^3$           | 8                |
| $\text{Eu}_2(\text{H}_2\text{O})(\text{DCPA})_3$                                                      | $\text{Cr}_2\text{O}_7^{2-}$ | $\text{H}_2\text{O}$ | $8.70 \times 10^3$           | 39               |
| $[\text{Tb}(\text{TATAB})(\text{H}_2\text{O})_2] \cdot \text{NMP} \cdot \text{H}_2\text{O}$           | $\text{Cr}_2\text{O}_7^{2-}$ | $\text{H}_2\text{O}$ | $1.11 \times 10^4$           | 40               |
| $[\text{Zn}(\text{tpb})(\text{Hbtc})]_n$                                                              | $\text{Cr}_2\text{O}_7^{2-}$ | $\text{H}_2\text{O}$ | $9.69 \times 10^3$           | <b>This work</b> |

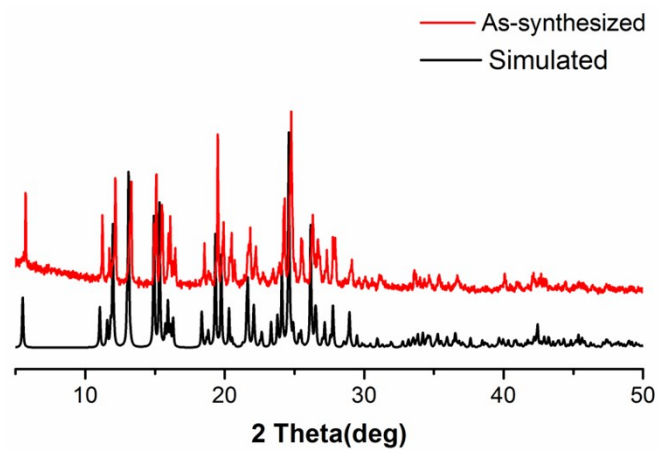

**Fig. S1** PXR D pattern of complex **1** simulated from the X-ray single-crystal data and as synthesized products.

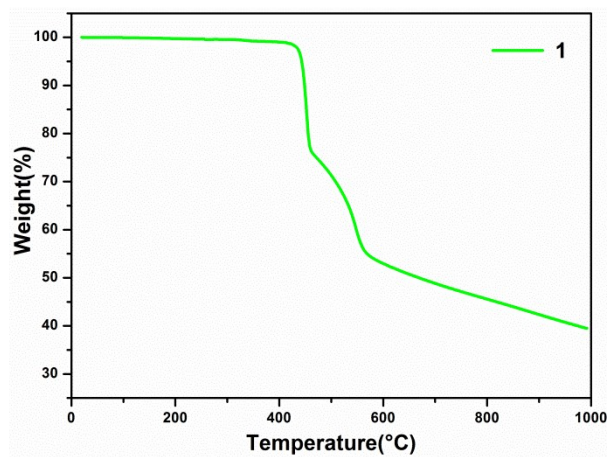

**Fig. S2** TGA plot of complex **1**.

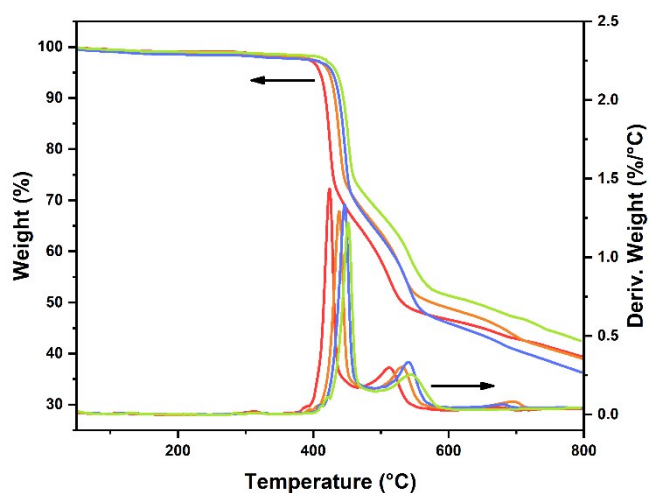

**Fig. S3** TGA and DTG curves of **1** at heating rates of 2 (red), 5 (orange), 8 (blue), and 10 (green)  $\text{K min}^{-1}$ .

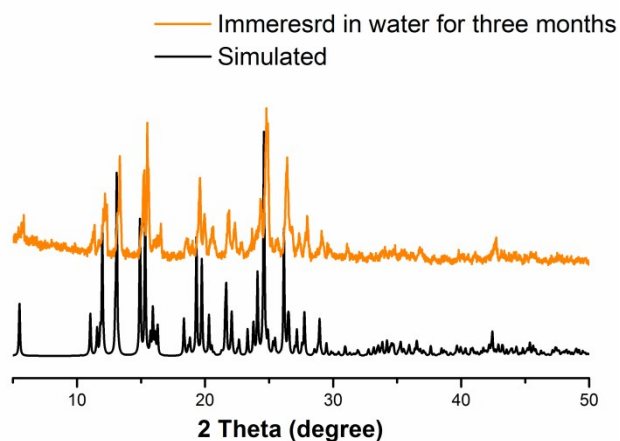

**Fig. S4** PXRD pattern of **1** immersed in water at room temperature for three months.

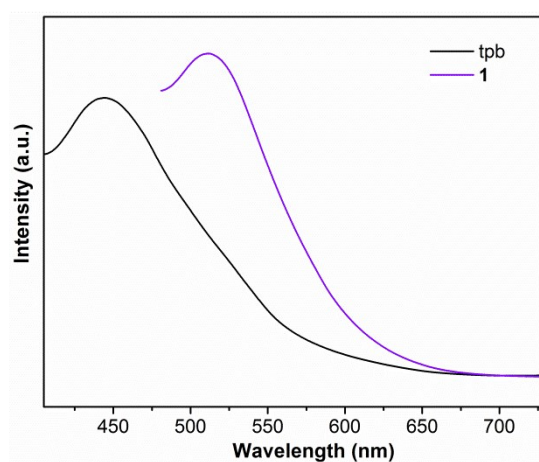

**Fig. S5** Emission spectra of **1** and tpb in the solid state at room temperature.

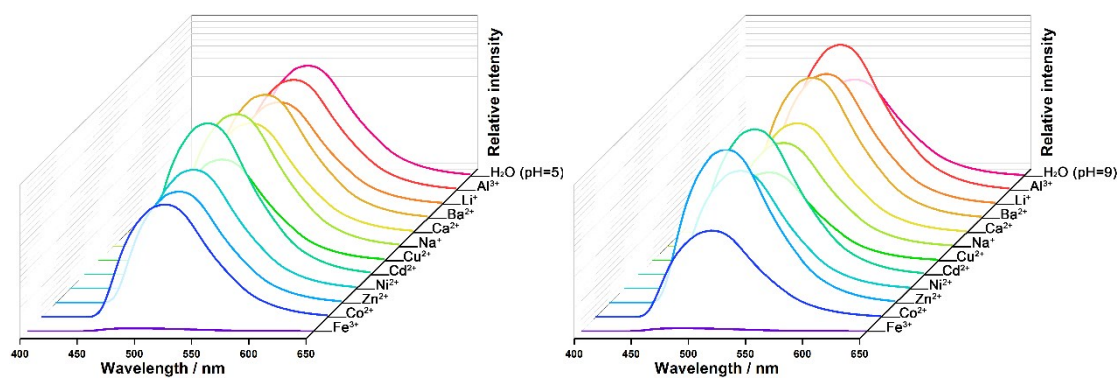

**Fig. S6** Luminescence spectra of **1** in various cations aqueous solutions (0.01 M) with different pH values (left: pH = 5; right: pH = 9).



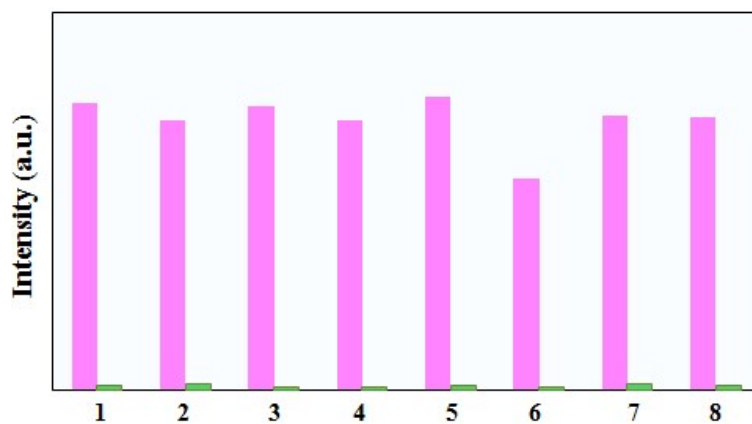

**Fig. S7** Luminescence intensity of **1** dispersed in water with the addition of different mixed ions (0.01 M) (1:  $\text{Al}^{3+}/\text{Ba}^{2+}$ ; 2:  $\text{Al}^{3+}/\text{Ca}^{2+}$ ; 3:  $\text{Zn}^{2+}/\text{Cd}^{2+}$ ; 4:  $\text{Cu}^{2+}/\text{Co}^{2+}$ ; 5:  $\text{Zn}^{2+}/\text{Cu}^{2+}$ ; 6:  $\text{Cd}^{2+}/\text{Co}^{2+}$ ; 7:  $\text{Li}^{+}/\text{Ni}^{2+}$ ; 8:  $\text{Ba}^{2+}/\text{Ca}^{2+}$ ) and  $\text{Fe}^{3+}$  incorporated systems (0.01 M).

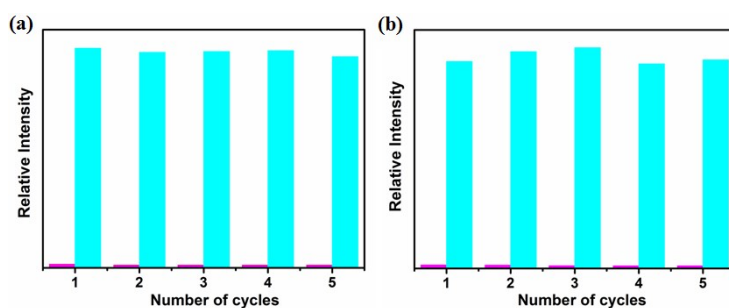

**Fig. S8** Multiple cycles for the luminescence quenching of **1** (magenta) by  $\text{Fe}^{3+}$  (a) and  $\text{Cr}_2\text{O}_7^{2-}$  (b); and recovery after washing by  $\text{H}_2\text{O}$  for several times (cyan).

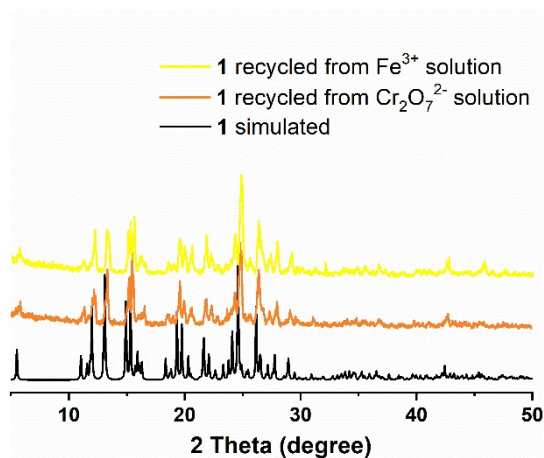

**Fig. S9** PXRD patterns of **1** treated by multiple cycles for the luminescence quenching by  $\text{Fe}^{3+}$  and  $\text{Cr}_2\text{O}_7^{2-}$ .

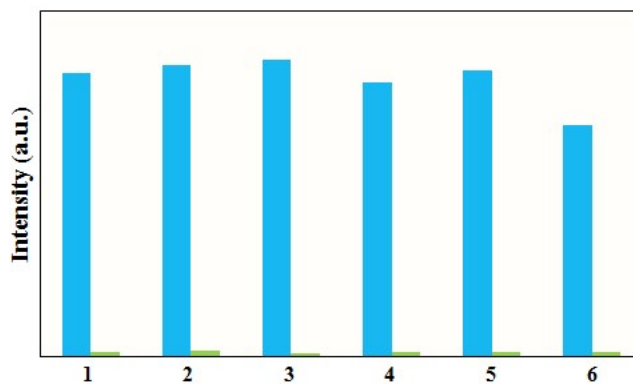

**Fig. S10** Luminescence intensity of **1** dispersed in water with the addition of different mixed ions (0.01 M) (1:  $\text{NO}_3^-/\text{C}_2\text{O}_4^{2-}$ ; 2:  $\text{Cl}^-/\text{SCN}^-$ ; 3:  $\text{SO}_4^{2-}/\text{Cl}^-$ ; 4:  $\text{SO}_4^{2-}/\text{NO}_3^-$ ; 5:  $\text{Br}^-/\text{C}_2\text{O}_4^{2-}$ ; 6:  $\text{Br}^-/\text{C}_2\text{O}_4^{2-}$ ) and  $\text{Cr}_2\text{O}_7^{2-}$  incorporated systems (0.01 M).

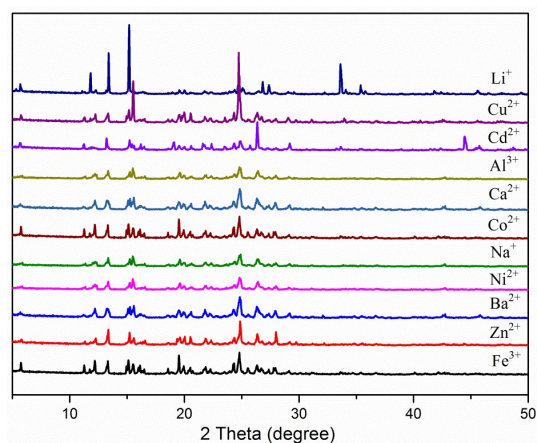

**Fig. S11** The PXRD patterns of **1** after cations sensing experiments in aqueous solutions of  $\text{M}(\text{NO}_3)_n$  ( $\text{M} = \text{Li}^+, \text{Cu}^{2+}, \text{Cd}^{2+}, \text{Al}^{3+}, \text{Ca}^{2+}, \text{Co}^{2+}, \text{Na}^+, \text{Ni}^{2+}, \text{Ba}^{2+}, \text{Zn}^{2+},$  and  $\text{Fe}^{3+}$ ).

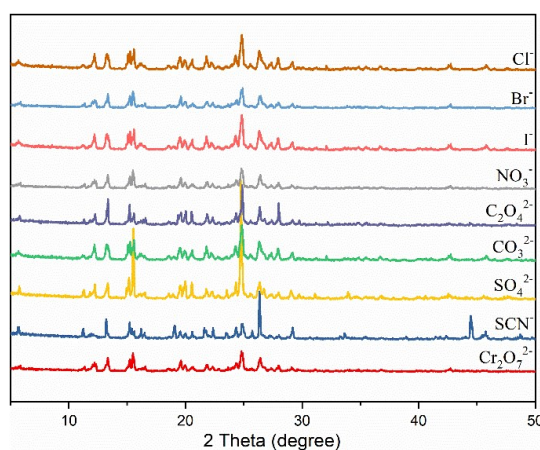

**Fig. S12** The PXRD patterns of **1** after anions sensing experiments in aqueous solutions of  $\text{K}_n(\text{A})$  ( $\text{A} = \text{Cl}^-, \text{Br}^-, \text{I}^-, \text{NO}_3^-, \text{C}_2\text{O}_4^{2-}, \text{CO}_3^{2-}, \text{SO}_4^{2-}, \text{SCN}^-,$  and  $\text{Cr}_2\text{O}_7^{2-}$ ).

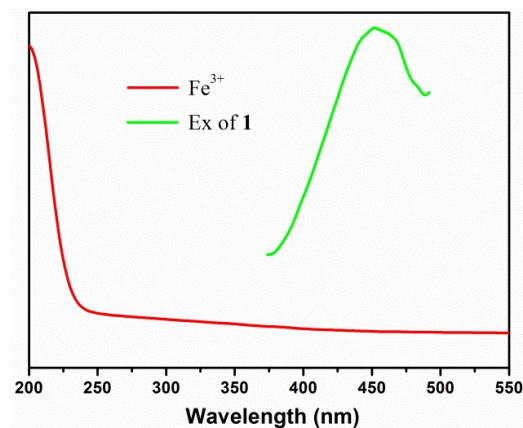

**Fig. S13** UV-Vis absorption spectra of  $\text{Fe}(\text{NO}_3)_3$  aqueous solutions and the excitation spectrum of **1**.

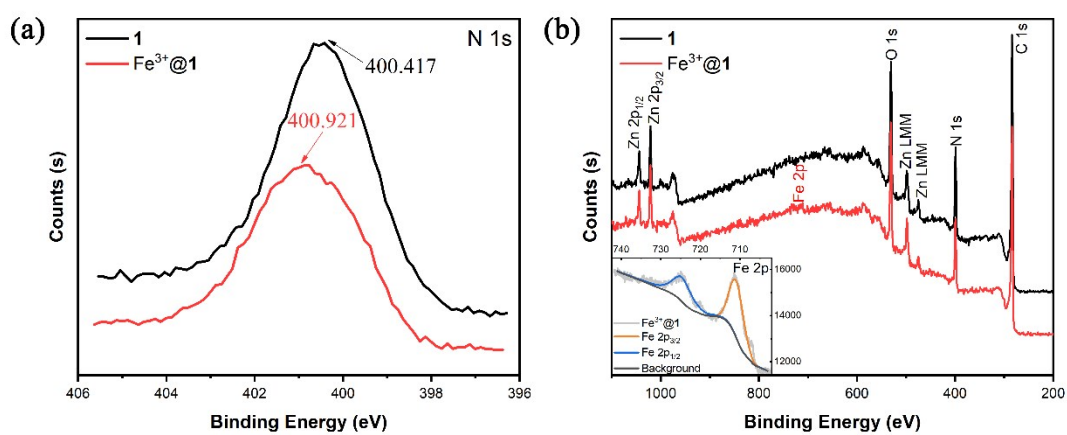

**Fig. S14** (a) The N 1s XPS spectra of **1** (black) and  $\text{Fe}^{3+}@1$  (red); (b) Wide XPS spectra of **1** (black) and  $\text{Fe}^{3+}@1$  (red). (Inset: Fe 2p XPS spectra of  $\text{Fe}^{3+}@1$ )

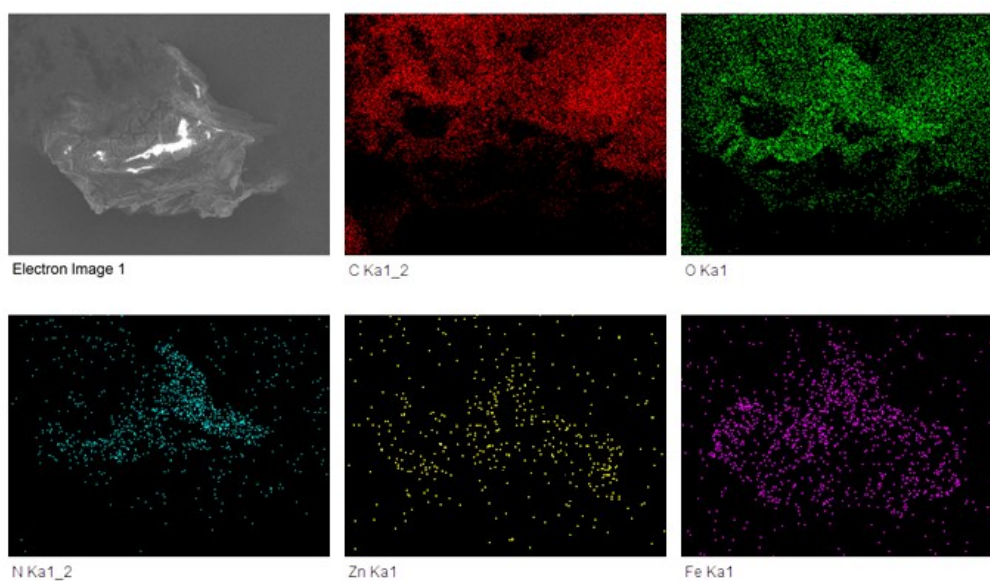

**Fig. S15** EDX mapping of  $\text{Fe}^{3+}@1$ .

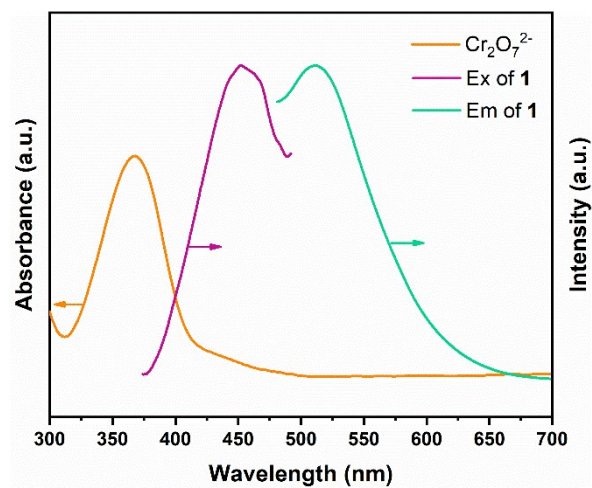

**Fig. S16** UV-Vis absorption spectra of  $\text{K}_2\text{Cr}_2\text{O}_7$  aqueous solutions together with the excitation and emission spectra of **1**.

## References

- 1 W. H. Huang, J. Z. Li, T. Liu, L. S. Gao, M. Jiang, Y. N. Zhang and Y. Y. Wang, *RSC Adv.*, 2015, **5**, 97127–97132.
- 2 H. He, D. Y. Zhang, F. Guo and F. Sun, *Inorg. Chem.*, 2018, **57**, 7314–7320.
- 3 X. lei Zhang, S. mei Li, S. Chen, F. Feng, J. quan Bai and J. rong Li, *Ecotoxicol. Environ. Saf.*, 2020, **187**, 109821.
- 4 D. Wu, J. Liu, J. Jin, J. Cheng, M. Wang, G. Yang and Y. Y. Wang, *Cryst. Growth Des.*, 2019, **19**, 6774–6783.
- 5 S. Xing, Q. Bing, H. Qi, J. Liu, T. Bai, G. Li, Z. Shi, S. Feng and R. Xu, *ACS Appl. Mater. Interfaces*, 2017, **9**, 23828–23835.
- 6 J. K. Wang, X. W. Wang, Z. S. Wang, L. S. Yao, L. Z. Niu, Y. H. Yu and J. S. Gao, *Polyhedron*, 2019, **167**, 85–92.
- 7 H. G. Hao, Y. C. Wang, S. X. Yuan, D. M. Chen, D. C. Li and J. M. Dou, *Inorg. Chem. Commun.*, 2018, **98**, 120–126.
- 8 R. Lv, J. Wang, Y. Zhang, H. Li, L. Yang, S. Liao, W. Gu and X. Liu, *J. Mater. Chem. A*, 2016, **4**, 15494–15500.
- 9 N. Abdollahi and A. Morsali, *Anal. Chim. Acta*, 2019, **1064**, 119–125.
- 10 H. Jin, J. Xu, L. Zhang, B. Ma, X. Shi, Y. Fan and L. Wang, *J. Solid State Chem.*, 2018, **268**, 168–174.
- 11 L. Fan, Z. Liu, Y. Zhang, D. Zhao, J. Yang and X. Zhang, *Inorg. Chem. Commun.*, 2019, **107**, 107463.
- 12 A. Maji, P. Majee, D. K. Singha, A. K. Ghosh, S. K. Mondal and P. Mahata, *J. Photochem. Photobiol. A Chem.*, 2018, **365**, 125–132.
- 13 F. H. Zhao, W. Y. Guo, S. Y. Li, Z. L. Li, X. Q. Yan, X. M. Jia, L. W. Huang and J. M. You, *J. Solid State Chem.*, 2019, **278**, 120926.
- 14 Y. J. Yang, D. Liu, Y. H. Li and G. H. Cui, *J. Solid State Chem.*, 2019, **278**, 120891.
- 15 X. Du Zhang, Y. Zhao, K. Chen, Y. F. Jiang and W. Y. Sun, *Chem. - An Asian J.*, 2019, **14**, 3620–3626.
- 16 X. Y. Guo, Z. P. Dong, F. Zhao, Z. L. Liu and Y. Q. Wang, *New J. Chem.*, 2019, **43**, 2353–2361.
- 17 J. Y. Zou, L. Li, S. Y. You, H. M. Cui, Y. W. Liu, K. H. Chen, Y. H. Chen, J. Z. Cui and S. W. Zhang, *Dye. Pigment.*, 2018, **159**, 429–438.
- 18 J. Zhang, L. Gong, J. Feng, J. Wu and C. Zhang, *New J. Chem.*, 2017, **41**, 8107–8117.
- 19 X. M. Kang, X. Y. Fan, P. Y. Hao, W. M. Wang and B. Zhao, *Inorg. Chem. Front.*, 2019, **6**, 271–277.
- 20 Z. Q. Yao, G. Y. Li, J. Xu, T. L. Hu and X. H. Bu, *Chem. – A Eur. J.*, 2018, **24**, 3192–3198.
- 21 S. Z. Wen, W. Q. Kan, L. L. Zhang and Y. C. He, *Cryst. Res. Technol.*, 2017, **52**, 1700105.
- 22 H. He, Q. Q. Zhu, C. P. Li and M. Du, *Cryst. Growth Des.*, 2019, **19**, 694–703.
- 23 T. Wiwasuku, J. Boonmak, K. Siri Wong, V. Ervithayasuporn and S. Youngme, *Sensors Actuators, B Chem.*, 2019, **284**, 403–413.
- 24 C. S. Cao, H. C. Hu, H. Xu, W. Z. Qiao and B. Zhao, *CrystEngComm*, 2016, **18**, 4445–4451.
- 25 X. H. Zhou, L. Li, H. H. Li, A. Li, T. Yang and W. Huang, *Dalton Trans.*, 2013, **42**, 12403–12409.
- 26 W. Liu, X. Huang, C. Xu, C. Chen, L. Yang, W. Dou, W. Chen, H. Yang and W. Liu, *Chem. –*

- Eur. J.*, 2016, **22**, 18769–18776.
- 27 X. Y. Dong, R. Wang, J. Z. Wang, S. Q. Zang and T. C. W. Mak, *J. Mater. Chem. A*, 2015, **3**, 641–647.
- 28 M. Zheng, H. Tan, Z. Xie, L. Zhang, X. Jing and Z. Sun, *ACS Appl. Mater. Interfaces*, 2013, **5**, 1078–1083.
- 29 R. Dalapati, Ü. Kökçam-Demir, C. Janiak and S. Biswas, *Dalton Trans.*, 2018, **47**, 1159–1170.
- 30 Y. Zhou, H. H. Chen and B. Yan, *J. Mater. Chem. A*, 2014, **2**, 13691–13697.
- 31 A. J. Weerasinghe, C. Schmiesing, S. Varaganti, G. Ramakrishna and E. Sinn, *J. Phys. Chem. B*, 2010, **114**, 9413–9419.
- 32 J. Wang, J. R. Wang, Y. Li, M. Jiang, L. W. Zhang and P. Y. Wu, *New J. Chem.*, 2016, **40**, 8600–8606.
- 33 C. Q. Zhang, Y. Yan, Q. H. Pan, L. B. Sun, H. M. He, Y. L. Liu, Z. Q. Liang and J. Y. Li, *Dalton Trans.*, 2015, **44**, 13340–13346.
- 34 B. Wang, Q. Yang, C. Guo, Y. X. Sun, L. H. Xie and J. R. Li, *ACS Appl. Mater. Interfaces*, 2017, **9**, 10286–10295.
- 35 M. Wang, J. G. Wang, W. J. Xue and A. X. Wu, *Dyes Pigm.*, 2013, **97**, 475–480.
- 36 S. G. Chen, Z. Z. Shi, L. Qin, H. L. Jia and H. G. Zheng, *Cryst. Growth Des.*, 2017, **17**, 67–72.
- 37 J. N. Hao and B. Yan, *New J. Chem.*, 2016, **40**, 4654–4661.
- 38 T. Q. Song, J. Dong, H. L. Gao, J. Z. Cui and B. Zhao, *Dalton Trans.*, 2017, **46**, 13862–13868.
- 39 H. M. He, S. H. Chen, D. Y. Zhang, R. Hao, C. Zhang, E. C. Yang and X. J. Zhao, *Dalton Trans.*, 2017, **46**, 13502–13509.
- 40 G. Wen, M. Han, X. Wu, Y. Wu, W. Dong, J. Zhao, D. Li and L. Ma, *Dalton Trans.*, 2016, **45**, 15492–15499.
